1                                    **SARS-CoV-2 RNA titers in wastewater anticipated**  
2                                    **COVID-19 occurrence in a low prevalence area**

3

4    Walter Randazzo<sup>1,2</sup>, Pilar Truchado<sup>3</sup>, Enric Cuevas-Ferrando<sup>2</sup>, Pedro Simón<sup>4</sup>, Ana  
5    Allende<sup>3</sup>, Gloria Sánchez<sup>2\*</sup>

6

7    <sup>1</sup>Department of Microbiology and Ecology, University of Valencia, Av. Dr. Moliner,  
8    50, Burjassot, 46100 Valencia, Spain;

9    <sup>2</sup>Department of Preservation and Food Safety Technologies, Institute of Agrochemistry  
10    and Food Technology, IATA-CSIC, Av. Agustín Escardino 7, Paterna, 46980, Valencia,  
11    Spain;

12    <sup>3</sup>Research Group on Quality, Safety and Bioactivity of Plant Foods, Department of  
13    Food Science and Technology, CEBAS-CSIC, Campus Universitario de Espinardo, 25,  
14    30100, Murcia, Spain;

15    <sup>5</sup>ESAMUR, Avenida Juan Carlos, s/n - Edificio Torre Jemeca, Murcia, Spain.

16

17    **Running title:** First detection of SARS-CoV-2 in untreated wastewater in Spain.

18

19    \*Correspondence to: Gloria Sánchez, [gloriasanchez@iata.csic.es](mailto:gloriasanchez@iata.csic.es).

20 **Abstract**

21 Severe acute respiratory syndrome coronavirus 2 (SARS-CoV-2) has caused more than  
22 200,000 reported COVID-19 cases in Spain resulting in more than 20,800 deaths as of  
23 April 21, 2020. Faecal shedding of SARS-CoV-2 RNA from COVID-19 patients has  
24 extensively been reported. Therefore, we investigated the occurrence of SARS-CoV-2  
25 RNA in six wastewater treatments plants (WWTPs) serving the major municipalities  
26 within the Region of Murcia (Spain), the area with the lowest COVID-19 prevalence  
27 within Iberian Peninsula. Firstly, an aluminum hydroxide adsorption-precipitation  
28 concentration method was tested using a porcine coronavirus (Porcine Epidemic  
29 Diarrhea Virus, PEDV) and mengovirus (MgV). The procedure resulted in average  
30 recoveries of  $10.90 \pm 3.54\%$  and  $10.85 \pm 2.11\%$  in influent water and  $3.29 \pm 1.58\%$  and  
31  $6.19 \pm 1.00\%$  in effluent water samples for PEDV and MgV, respectively. Then, the  
32 method was used to monitor the occurrence of SARS-CoV-2 from March 12 to April  
33 14, 2020 in influent, secondary and tertiary effluent water samples. By using the real-  
34 time RT-PCR (RT-qPCR) Diagnostic Panel validated by US CDC that targets three  
35 regions of the virus nucleocapsid (N) gene, we estimated quantification of SARS-CoV-  
36 2 RNA titers in untreated wastewater waters of  $5.38 \pm 0.21$  log genomic copies/L on  
37 average. Two secondary water samples resulted positive (2 out of 18) and all tertiary  
38 water samples tested as negative (0 out 12). This environmental surveillance data were  
39 compared to declared COVID-19 cases at municipality level, revealing that SARS-  
40 CoV-2 was circulating among the population even before the first cases were reported  
41 by local or national authorities in many of the cities where wastewaters have been  
42 sampled. The detection of SARS-CoV-2 in wastewater in early stages of the spread of  
43 COVID-19 highlights the relevance of this strategy as an early indicator of the infection  
44 within a specific population. At this point, this environmental surveillance could be

45 implemented by municipalities right away as a tool, designed to help authorities to  
46 coordinate the exit strategy to gradually lift its coronavirus lockdown.

47

48 **Keywords:** environmental surveillance, influent water, reclaimed water, concentration  
49 protocol, RNA virus, coronavirus.

## 50        **1. Introduction**

51        Coronaviruses (CoVs) are a family of viruses pathogenic for humans and animals  
52        associated to respiratory and gastro-intestinal infections. CoVs used to be considered as  
53        minor pathogens for humans as they were responsible of common cold or mild  
54        respiratory infections in immunocompetent people. Nonetheless, the emergence of  
55        novel and highly pathogenic zoonotic diseases caused by CoVs such as Severe Acute  
56        Respiratory Syndrome (SARS), Middle East Respiratory Syndrome (MERS) and most  
57        recently SARS-CoV-2 arises questions to be addressed to guide public health response.

58        CoVs are mainly transmitted through respiratory droplets. However, as for SARS and  
59        MERS, SARS-CoV-2 RNA has been detected in stool samples from patients suffering  
60        COVID-19 and from asymptomatic carriers (He et al., 2020; Pan et al., 2020; Woelfel et  
61        al., 2020; Young et al., 2020; Zhang et al., 2020). The duration of viral shedding has  
62        been observed to vary among patients with means of 14-21 days (Y. Wu et al., 2020; Xu  
63        et al., 2020), as well as the magnitude of shedding varies from  $10^2$  up to  $10^8$  RNA  
64        copies per gram (Lescure et al., 2020; Pan et al., 2020; Woelfel et al., 2020).

65        Infectious viruses deriving from fecal specimen have been cultured in Vero E6 cells and  
66        observed by electron microscopy (Wang et al., 2020). In addition, gastric, duodenal, and  
67        rectal epithelial cells are infected by SARS-CoV-2 and the release of the infectious  
68        virions to the gastrointestinal tract supports the possible fecal-oral transmission route  
69        (Xiao et al., 2020). Even though the possibility of faecal-oral transmission has been  
70        hypothesized, the role of secretions in the spreading of the disease is not clarified yet  
71        (Wang et al., 2020; Y. Wu et al., 2020; Xu et al., 2020; Yeo et al., 2020).

72        Wastewater monitoring has been a successful strategy pursued to track chemical and  
73        biological markers of human activity including illicit drugs consumption,  
74        pharmaceuticals use/abuse, water pollution, and occurrence of antimicrobial resistance

75 genes (Choi et al., 2018; de Oliveira et al., 2020; Lorenzo and Picó, 2019; Mercan et al.,  
76 2019). Viral diseases have been also surveilled by the detection of genetic material into  
77 wastewater as for enteric viruses (Hellmer et al., 2014; Prevost et al., 2015; Santiso-  
78 Bellón et al., 2020), re-emerging zoonotic hepatitis E virus (Cuevas-Ferrando et al.,  
79 2020; Miura et al., 2016), and poliovirus during the global eradication programme  
80 (Asghar et al., 2014).

81 Currently, various studies detected SARS-CoV-2 RNA in wastewater worldwide  
82 (Ahmed et al., 2020; Lodder and de Roda Husman, 2020; Medema et al., 2020; F. Wu  
83 et al., 2020; Wurtzer et al., 2020), and wastewater testing has been suggested as a non-  
84 invasive early-warning tool for monitoring the status and trend of COVID-19 infection  
85 and as an instrument for tuning public health response (Daughton, 2020; Mallapaty,  
86 2020; Naddeo and Liu, 2020). Under current circumstance, this environmental  
87 surveillance could be implemented in wastewater treatment plants as a tool, designed to  
88 help authorities to coordinate the exit strategy to gradually lift its coronavirus lockdown.  
89 Here, we report the first detection of SARS-CoV-2 RNA in untreated wastewater  
90 samples in Spain collected from six different wastewater treatment plants (WWTPs) in  
91 Murcia, the lowest prevalence area in Iberian Peninsula. Additionally, the efficacy of  
92 the secondary and tertiary treatments implemented in the WWTPs against SARS-CoV-2  
93 has been confirmed. The outcomes of the environmental surveillance reflect the  
94 epidemiological data in a low COVID-19 diagnosed cases setting, thus supporting the  
95 need of developing and implementing advanced models for wastewater-based  
96 epidemiology (WBE).

97        **2. Material and methods**

98        **2.1. Sampling sites and samples collection**

99        Influent and effluent water samples were collected from six WWTPs located in the main  
100        cities of the Region of Murcia, Spain (Figure 1). Technical data on WWTPs are  
101        provided in Table 1.

102        A total of 42 influent, and 18 secondary and 12 tertiary treated effluent water samples  
103        were collected from 12 March to 14 April 2020 and investigated for the occurrence of  
104        SARS-CoV-2 RNA. Collected samples were transferred on ice to the laboratory and  
105        concentrated on the same day of sampling or the day after.

106

107        **2.2. Wastewater and effluent water concentration**

108        The porcine epidemic diarrhea virus (PEDV) strain CV777 and the mengovirus (MgV)  
109        vMC0 (CECT 100000) were preliminary used to evaluate the aluminum hydroxide  
110        adsorption-precipitation method previously described for concentrating enteric viruses  
111        from wastewater and effluent water (AAVV, 2011; Randazzo et al., 2019). In brief, 200  
112        mL of biobanked influent (n=2) and effluent water samples (n=2) were artificially  
113        inoculated with PEDV and MgV. Then pH was adjusted to 6.0 and Al(OH)<sub>3</sub> precipitate  
114        formed by adding 1 part 0.9N AlCl<sub>3</sub> (Acros organics, Geel, Belgium) solution to 100  
115        parts of sample. The pH was readjusted to 6.0 and sample mixed using an orbital shaker  
116        at 150 rpm for 15 min at room temperature. Then, viruses were concentrated by  
117        centrifugation at 1,700 × g for 20 min. The pellet was resuspended in 10 mL of 3% beef  
118        extract pH 7.4, and samples were shaken for 10 min at 150 rpm. Concentrate was  
119        recovered by centrifugation at 1,900 × g for 30 min and pellet resuspended in 1 mL of  
120        PBS.

121 All wastewater and effluent water samples included in this study were processed as  
122 described and MgV (5 log PCRU) was spiked as process control.

123

### 124 **2.3. Viral extraction, detection and quantification**

125 Viral RNA was extracted from concentrates using the NucleoSpin RNA virus kit  
126 (Macherey-Nagel GmbH & Co., Düren, Germany) according to the manufacturer's  
127 instructions with some modifications. Briefly, 150 µL of the concentrated sample was  
128 mixed with 25 µL of Plant RNA Isolation Aid (Thermo Fisher Scientific, Vilnius,  
129 Lithuania) and 600 µL of lysis buffer from the NucleoSpin virus kit and subjected to  
130 pulse-vortexing for 1 min. Then, the homogenate was centrifuged for 5 min at 10,000 ×  
131 g to remove the debris. The supernatant was subsequently processed according to the  
132 manufacturer's instructions.

133 Viral RNA was detected by TaqMan real-time RT-PCR (RT-qPCR) on LightCycler 480  
134 instrument (Roche Diagnostics, Germany). MgV RNA was detected by using  
135 UltraSense One-Step kit (Invitrogen, SA, US) and the RT-qPCR assay as in ISO 15216-  
136 1:2017 (Costafreda et al., 2006; ISO 15216-1, 2017). Undiluted and ten-fold diluted  
137 MgV RNA was tested to check for RT-qPCR inhibitors.

138 PEDV RNA was detected by using PrimeScript™ One Step RT-PCR Kit (Takara Bio,  
139 USA) and the TaqMan RT-qPCR assay described by (Zhou et al., 2017).

140 SARS-CoV-2 RNA was detected by using PrimeScript™ One Step RT-PCR Kit and the  
141 RT-qPCR diagnostic panel assays validated by the US Centers for Disease Control and  
142 Prevention (CDC, 2020). The first version of the kit with three sets of oligonucleotide  
143 primers and probes was used to target three different SARS-CoV-2 regions of the  
144 nucleocapsid (N) gene. The sets of primer and probes (2019-nCoV RUO Kit) as well as  
145 the positive control (2019-nCoV\_N\_Positive Control) were provided by IDT (Integrated

146 DNA Technologies, Leuven, Belgium). Each RNA was analyzed in duplicate and every  
147 RT-qPCR assay included negative (nuclease-free water) and positive controls.  
148 Biobanked samples (n=4) collected in October 2019, before the first COVID-19 case  
149 was documented, were used as relevant negative control to exclude false positive  
150 reactions.  
151 SARS-CoV-2 RNA was quantified as genome copies (gc) by plotting the quantification  
152 cycles (Ct) to an external standard curve built with 10-fold serial dilution of a quantified  
153 plasmid control (IDT). MgV and PEDV RNA were quantified by plotting the Cts to an  
154 external standard curve generated by serial end-point dilution method.  
155 MgV recovery rates were calculated and used as quality assurance parameters according  
156 to ISO 15216-1:2017 (ISO 15216-1, 2017).

157

### 158 **3. Results and Discussion**

#### 159 **3.1. Performance of the concentration method**

160 The aluminum hydroxide adsorption-precipitation method was tested by spiking  
161 influent and effluent samples with MgV and PEDV. On average, MgV was recovered at  
162 ranges of  $10.85 \pm 2.11\%$  in influent and  $6.19 \pm 1.00\%$  in effluent water. PEDV was  
163 recovered at ranges of  $10.90 \pm 3.54\%$  in influent and  $3.29 \pm 1.58\%$  in effluent water.  
164 These results are in line with the MgV recoveries reported for enteric viruses  
165 concentration in water samples by the same aluminum-based method (Cuevas-Ferrando  
166 et al., 2020; Randazzo et al., 2019) and higher than the 1% as the quality assurance  
167 parameter indicated for bottled water into ISO 15216-1:2017 (ISO 15216-1, 2017).  
168 Similarly, MgV was successfully used as recovery control for hepatitis E virus  
169 concentration from influent and effluent water samples (5-13%) by applying a  
170 polyethylene glycol (PEG) precipitation method (Miura et al., 2016). A similar PEG-



171 based protocol was recently used to recover SARS-CoV-2 from wastewater, although  
172 recovery control was not included in the study (F. Wu et al., 2020).  
173 Moreover, filtration through 10 kDa Centricon<sup>®</sup> Plus-70 centrifugal device successfully  
174 recovered SARS-CoV-2 in wastewater with recovery efficiencies of F-specific RNA  
175 phages of 73% (Medema et al., 2020). However, concentration by electropositive  
176 membrane should be further evaluated given a SARS-CoV recovery from wastewater of  
177 1% (Wang et al., 2005).  
178 Rigorous limits of detection should be established by spiking SARS-CoV-2 cell-culture  
179 adapted strain or positive COVID-19 fecal samples in influent and effluent wastewater  
180 samples to be concentrated following the aluminum hydroxide adsorption-precipitation  
181 method. Nonetheless, the need of a BSL3 laboratory facility to handle SARS-CoV-2  
182 represents the main limitation of this experiment.

183

### 184 **3.2. SARS-CoV-2 titers in wastewater and effluent water**

185 A total of 42 influent, and 18 secondary and 12 tertiary treated effluent water samples  
186 were collected from 12 March to 14 April 2020 and investigated for the occurrence of  
187 SARS-CoV-2 RNA. Samples were considered positive for Ct below 40 (as in Medema  
188 et al., 2020 and F. Wu et al., 2020) and titrated by using the quantified plasmid control  
189 for each of the RT-qPCR targets.

190 The 83.3% (35 positive samples out of 42) influent samples and the 11.1% (2 out of 18)  
191 secondary treated water samples were tested positive for at least one SARS-CoV-2 RT-  
192 qPCR target. None of the tertiary effluent samples (0 out of 12) tested positive for any  
193 of the SARS-CoV-2 RT-qPCR target (Figure 2). A relevant number of influent water  
194 samples (12%) showed Ct ranging between 37 and 40, even though lower Ct of 34-37

195 were observed (29%). In all samples, MgV recoveries were above 1% ( $10.05 \pm$   
196  $14.10\%$ ).

197 On average, SARS-CoV-2 RNA titers of  $5.15 \pm 0.25$ ,  $5.53 \pm 0.24$ , and  $5.49 \pm 0.27$  log  
198 gc/L were quantified in wastewater by using N1, N2 and N3 primer/probe mixes,  
199 respectively. Titers of 4 and 5 to more than 6 log gc/L have been reported in  
200 Massachusetts and France, respectively (F. Wu et al., 2020; Wurtzer et al., 2020).

201 A secondary effluent sample resulted positive for N2 and quantified as 5.40 log gc/L.  
202 An additional secondary effluent sample was positive for the three molecular targets and  
203 below the quantification limit.

204 Detection of SARS-CoV-2 RNA in influent water has been reported worldwide (Ahmed  
205 et al., 2020; Lodder and de Roda Husman, 2020; Medema et al., 2020; F. Wu et al.,  
206 2020), and only one study tested treated wastewater that resulted positive (Paris)  
207 (Wurtzer et al., 2020). We observed discrepancies among RT-qPCR N1, N2 and N3  
208 assays for several water samples in agreement to a previous report (Medema et al.,  
209 2020). This could be due to the different analytical sensitivity among the assays as well  
210 as the detection of possible false positive samples by RT-qPCR N3 in low concentrated  
211 samples (Jung et al., 2020; Vogels et al., 2020). The latter possibility has been solved by  
212 excluding the N3 primers/probe set from the US CDC 2019-nCoV RT-qPCR  
213 diagnostic panel in its last revision (March, 30) (CDC, n.d.). In addition, a partial  
214 inhibitory effect of the matrix is not to be completely excluded despite the controls  
215 included in the assays. A more sensitive estimation of SARS-CoV-2 loads in  
216 wastewater should be studied by digital RT-qPCR (dRT-qPCR). dRT-qPCR could be  
217 used to quantify samples with low viral loads, even though it may not be the best  
218 practical and economically sustainable option for environmental surveillance.

219 Even though the SARS-CoV-2 RNA detection in wastewater is functional for WBE  
220 purposes, the risk for human health associated to the water cycle is still under debate as  
221 infectivity of viral particles remain to be confirmed as well as its potential fecal-oral  
222 transmission.

223 In spite of the high concentration of viral RNA in specimen and the evidence of  
224 gastrointestinal infection (Xiao et al., 2020), infectious viruses from stools have been  
225 isolated in one study (Wang et al., 2020) while another attempt resulted without success  
226 (Woelfel et al., 2020).

227 The potential transmission of SARS-CoV-2 via wastewater has not been proven (CDC,  
228 n.d.; WHO, 2020) and it seems unlikely given the poor viral stability in environmental  
229 conditions and its elevated sensitivity to disinfectants (Chin et al., 2020; Haas, 2020;  
230 Lodder and de Roda Husman, 2020).

231

### 232 **3.3. Environmental surveillance**

233 Epidemiological data on COVID-19 in the Murcia Region have been retrieved from the  
234 publically available repository of the “Servicio de epidemiología” of the “Consejería de  
235 Salud de la Región de Murcia” (available at <http://www.murciasalud.es/principal.php>)  
236 (Table 2) and plotted to the SARS-CoV-2 RNA mean loads as detected by three RT-  
237 qPCR assays (Figure 3).

238 In general, RT-qPCR amplification signals have been detected in wastewaters when  
239 cases were diagnosed within the municipality. Positive wastewater samples have been  
240 detected with at least two out of three RT-qPCR assays in low prevalence municipalities  
241 as in Murcia (96 cases, 21.18 cases per 100,000 inhabitants), Cartagena (36 cases,  
242 16.76) and Molina de Segura (12 cases, 16.69). Of note, positive wastewater samples

243 were detected 12-16 days before COVID-19 cases were declared in Lorca, Cieza and  
244 Totana municipalities.

245 A similar study conducted in Paris (France) demonstrated the detection of viral genome  
246 before the exponential phase of the epidemic (Wurtzer et al., 2020). However, our  
247 results indicate that SARS-CoV-2 can be detected weeks before the first confirmed  
248 case. The early detection of SARS-CoV-2 RNA in wastewater could have alerted about  
249 the imminent danger, giving a valuable time to the managers to coordinate and  
250 implement actions to slow the spread of the disease. Therefore, our outcomes support  
251 that WBE could be used as an early warning tool to monitor the status and the trend of  
252 COVID-19 infection within a community.

253 On the other hand, we believe that this environmental surveillance could be used as an  
254 instrument to drive the right decisions to reduce the risk of lifting restrictions too early.  
255 For instance, a key question is how to reduce the risk of a “second wave” and/or  
256 recurring local outbreaks. Massive population tests are the first choice, but in their  
257 absence, wastewater monitoring of SARS-CoV-2 RNA can give a reliable picture of  
258 the current situation. Our wastewater data do not quantitatively resemble the prevalence  
259 of COVID-19 confirmed cases. To this end, a quantitative model that includes and  
260 corrects all the variables affecting these wastewater surveillance data would be useful  
261 for a better interpretation. For instance, not all COVID-19 positive patients excrete  
262 SARS-CoV-2 RNA in faeces, and when it occurs, the titers and the duration of shedding  
263 vary among individuals and across time (He et al., 2020; Pan et al., 2020; Woelfel et al.,  
264 2020; Xu et al., 2020). On the other hand, the real number of positive cases within the  
265 Murcia Region remains unknown because of the large number of mild or asymptomatic  
266 carriers that have not been included in epidemiological statistics.

267 These aspects together with environmental variables (e.g., rainfall events, temperature)  
268 increase the uncertainties linked to the correlation between SARS-CoV-2 RNA  
269 detection in wastewater samples and the prevalence of COVID-19 that could be  
270 explored by using complex models.

#### 271 **4. Conclusion**

272 Overall, wastewater surveillance and WBE may represent a complementary approach to  
273 estimate the presence and even the prevalence of COVID-19 in communities. This  
274 represents an effective tool that needs to be further explored in order to direct public  
275 health response, especially in cases of limited capacity for clinical testing.

276

#### 277 **Funding**

278 The study was funded by the projects 20180705 of ESAMUR, 202070E101 of CSIC  
279 and “VIRIDIANA” AGL2017-82909 (AEI/FEDER, UE) of MICIU. WR is supported  
280 by APOSTD/2018/150 postdoctoral fellowship of Generalitat Valenciana. EC-F is  
281 recipient of a predoctoral contract from the MICINN, Call 2018. PT is holder of the  
282 RYC2018- 025510-I Ramón y Cajal contract from the MICIU.

283

#### 284 **Acknowledgments**

285 The authors acknowledge the “Entidad Regional de Saneamiento y Depuración de  
286 Aguas Residuales (ESAMUR)” for authorizing the sampling and Prof. Ana Carvajal  
287 (Faculty of Veterinary Medicine, University of Leon, Spain) for kindly providing  
288 PEDV.

289

## 290 **References**

- 291 AAVV, 2011. Standard Methods For the Examination of Water and Wastewater (9510),  
292 in: Detection of Enteric Viruses. American Public Health Association.
- 293 Ahmed, W., Angel, N., Edson, J., Bibby, K., Bivins, A., O'Brien, J.W., Choi, P.M.,  
294 Kitajima, M., Simpson, S.L., Li, J., Tschärke, B., Verhagen, R., Smith, W.J.M.,  
295 Zaugg, J., Dierens, L., Hugenholtz, P., Thomas, K. V, Mueller, J.F., 2020. First  
296 confirmed detection of SARS-CoV-2 in untreated wastewater in Australia: A proof  
297 of concept for the wastewater surveillance of COVID-19 in the community. *Sci.*  
298 *Total Environ.* 138764.  
299 <https://doi.org/https://doi.org/10.1016/j.scitotenv.2020.138764>
- 300 Asghar, H., Diop, O.M., Weldegebriel, G., Malik, F., Shetty, S., El Bassioni, L.,  
301 Akande, A.O., Al Maamoun, E., Zaidi, S., Adeniji, A.J., Burns, C.C., Deshpande,  
302 J., Oberste, M.S., Lowther, S.A., 2014. Environmental surveillance for  
303 polioviruses in the Global Polio Eradication Initiative. *J. Infect. Dis.* 210 Suppl,  
304 S294-303. <https://doi.org/10.1093/infdis/jiu384>
- 305 CDC, 2020. CDC 2019-Novel Coronavirus (2019-nCoV) Real-Time RT-PCR  
306 Diagnostic Panel [WWW Document]. URL  
307 <https://www.fda.gov/media/134922/download>
- 308 CDC, n.d. CDC 2019-Novel Coronavirus (2019-nCoV) Real-Time RT-PCR Diagnostic  
309 Panel [WWW Document]. URL <https://www.fda.gov/media/134922/download>
- 310 CDC, n.d. Water Transmission and COVID-19: Questions and Answers [WWW  
311 Document]. URL <https://www.cdc.gov/coronavirus/2019-ncov/php/water.html>  
312 (accessed 4.21.20b).
- 313 Chin, A.W.H., Chu, J.T.S., Perera, M.R.A., Hui, K.P.Y., Yen, H.-L., Chan, M.C.W.,  
314 Peiris, M., Poon, L.L.M., 2020. Stability of SARS-CoV-2 in different  
315 environmental conditions. *The Lancet Microbe*.  
316 [https://doi.org/https://doi.org/10.1016/S2666-5247\(20\)30003-3](https://doi.org/https://doi.org/10.1016/S2666-5247(20)30003-3)
- 317 Choi, P.M., Tschärke, B.J., Donner, E., O'Brien, J.W., Grant, S.C., Kaserzon, S.L.,  
318 Mackie, R., O'Malley, E., Crosbie, N.D., Thomas, K. V, Mueller, J.F., 2018.  
319 Wastewater-based epidemiology biomarkers: Past, present and future. *TrAC -*  
320 *Trends Anal. Chem.* <https://doi.org/10.1016/j.trac.2018.06.004>
- 321 Costafreda, M.I., Bosch, A., Pintó, R.M., 2006. Development, evaluation, and  
322 standardization of a real-time TaqMan reverse transcription-PCR assay for  
323 quantification of hepatitis A virus in clinical and shellfish samples. *Appl. Environ.*  
324 *Microbiol.* 72, 3846–3855. <https://doi.org/10.1128/AEM.02660-05>
- 325 Cuevas-Ferrando, E., Randazzo, W., Pérez-Cataluña, A., Sánchez, G., 2020. HEV  
326 Occurrence in Waste and Drinking Water Treatment Plants . *Front. Microbiol.* .
- 327 Daughton, C., 2020. The international imperative to rapidly and inexpensively monitor  
328 community-wide Covid-19 infection status and trends. *Sci. Total Environ.* 138149.  
329 <https://doi.org/https://doi.org/10.1016/j.scitotenv.2020.138149>
- 330 de Oliveira, M., Frihling, B.E.F., Velasques, J., Filho, F.J.C.M., Cavalheri, P.S.,  
331 Migliolo, L., 2020. Pharmaceuticals residues and xenobiotics contaminants:  
332 Occurrence, analytical techniques and sustainable alternatives for wastewater

- 333 treatment. *Sci. Total Environ.* <https://doi.org/10.1016/j.scitotenv.2019.135568>
- 334 Haas, C., 2020. Coronavirus and Risk Analysis. *Risk Anal.* 40, 660–661.  
335 <https://doi.org/10.1111/risa.13481>
- 336 He, X., Lau, E.H.Y., Wu, P., Deng, X., Wang, J., Hao, X., Lau, Y.C., Wong, J.Y.,  
337 Guan, Y., Tan, X., Mo, X., Chen, Y., Liao, B., Chen, W., Hu, F., Zhang, Q.,  
338 Zhong, M., Wu, Y., Zhao, L., Zhang, F., Cowling, B.J., Li, F., Leung, G.M., 2020.  
339 Temporal dynamics in viral shedding and transmissibility of COVID-19. *Nat. Med.*  
340 <https://doi.org/10.1038/s41591-020-0869-5>
- 341 Hellmer, M., Paxeus, N., Magnus, L., Enache, L., Arnholm, B., Johansson, A.,  
342 Bergstrom, T., Norder, H., 2014. Detection of pathogenic viruses in sewage  
343 provided early warnings of hepatitis A virus and norovirus outbreaks. *Appl.*  
344 *Environ. Microbiol.* 80, 6771–6781. <https://doi.org/10.1128/AEM.01981-14>
- 345 ISO 15216-1, 2017. Microbiology of the Food Chain – Horizontal Method for  
346 Determination of Hepatitis A Virus and Norovirus Using Real-Time RT-PCR –  
347 Part 1: Method for Quantification. ISO 15216-1:2017.
- 348 Jung, Y.J., Park, G.-S., Moon, J.H., Ku, K., Beak, S.-H., Kim, Seil, Park, E.C., Park, D.,  
349 Lee, J.-H., Byeon, C.W., Lee, J.J., Maeng, J.-S., Kim, S.J., Kim, Seung Il, Kim, B.-  
350 T., Lee, M.J., Kim, H.G., 2020. Comparative analysis of primer-probe sets for the  
351 laboratory confirmation of SARS-CoV-2. *bioRxiv* 2020.02.25.964775.  
352 <https://doi.org/10.1101/2020.02.25.964775>
- 353 Lescure, F.-X., Bouadma, L., Nguyen, D., Parisey, M., Wicky, P.-H., Behillil, S.,  
354 Gaymard, A., Bouscambert-Duchamp, M., Donati, F., Le Hingrat, Q., Enouf, V.,  
355 Houhou-Fidouh, N., Valette, M., Mailles, A., Lucet, J.-C., Mentre, F., Duval, X.,  
356 Descamps, D., Malvy, D., Timsit, J.-F., Lina, B., van-der-Werf, S., Yazdanpanah,  
357 Y., 2020. Clinical and virological data of the first cases of COVID-19 in Europe: a  
358 case series. *Lancet Infect. Dis.* [https://doi.org/10.1016/S1473-3099\(20\)30200-0](https://doi.org/10.1016/S1473-3099(20)30200-0)
- 359 Lodder, W., de Roda Husman, A.M., 2020. SARS-CoV-2 in wastewater: potential  
360 health risk, but also data source. *Lancet Gastroenterol. Hepatol.*  
361 [https://doi.org/10.1016/S2468-1253\(20\)30087-X](https://doi.org/10.1016/S2468-1253(20)30087-X)
- 362 Lorenzo, M., Picó, Y., 2019. Wastewater-based epidemiology: current status and future  
363 prospects. *Curr. Opin. Environ. Sci. Heal.*  
364 <https://doi.org/10.1016/j.coesh.2019.05.007>
- 365 Mallapaty, S., 2020. How sewage could reveal true scale of coronavirus outbreak.  
366 *Nature.* <https://doi.org/10.1038/d41586-020-00973-x>
- 367 Medema, G., Heijnen, L., Elsinga, G., Italiaander, R., Brouwer, A., 2020. Presence of  
368 SARS-Coronavirus-2 in sewage. *medRxiv* 2020.03.29.20045880.  
369 <https://doi.org/10.1101/2020.03.29.20045880>
- 370 Mercan, S., Kuloglu, M., Asicioglu, F., 2019. Monitoring of illicit drug consumption  
371 via wastewater: development, challenges, and future aspects. *Curr. Opin. Environ.*  
372 *Sci. Heal.* <https://doi.org/10.1016/j.coesh.2019.05.002>
- 373 Miura, T., Lhomme, S., Le Saux, J.-C., Le Mehaute, P., Guillois, Y., Couturier, E.,  
374 Izopet, J., Abranavel, F., Le Guyader, F.S., 2016. Detection of Hepatitis E Virus in  
375 Sewage After an Outbreak on a French Island. *Food Environ. Virol.* 8, 194–9.



- 376 <https://doi.org/10.1007/s12560-016-9241-9>
- 377 Naddeo, V., Liu, H., 2020. Editorial Perspectives: 2019 novel coronavirus (SARS-CoV-  
378 2): what is its fate in urban water cycle and how can the water research community  
379 respond? *Environ. Sci. Water Res. Technol.* <https://doi.org/10.1039/D0EW90015J>
- 380 Pan, Y., Zhang, D., Yang, P., Poon, L.L.M., Wang, Q., 2020. Viral load of SARS-CoV-  
381 2 in clinical samples. *Lancet Infect. Dis.* 20, 411–412.  
382 [https://doi.org/10.1016/S1473-3099\(20\)30113-4](https://doi.org/10.1016/S1473-3099(20)30113-4)
- 383 Prevost, B., Lucas, F.S., Goncalves, A., Richard, F., Moulin, L., Wurtzer, S., 2015.  
384 Large scale survey of enteric viruses in river and waste water underlines the health  
385 status of the local population. *Environ. Int.* 79, 42–50.  
386 <https://doi.org/10.1016/j.envint.2015.03.004>
- 387 Randazzo, W., Piqueras, J., Evtoski, Z., Sastre, G., Sancho, R., Gonzalez, C., Sanchez,  
388 G., 2019. Interlaboratory Comparative Study to Detect Potentially Infectious  
389 Human Enteric Viruses in Influent and Effluent Waters. *Food Environ. Virol.*  
390 <https://doi.org/10.1007/s12560-019-09392-2>
- 391 Santiso-Bellón, C., Randazzo, W., Pérez-Cataluña, A., Vila-Vicent, S., Gozalbo-Rovira,  
392 R., Muñoz, C., Buesa, J., Sanchez, G., Díaz, J.R., 2020. Epidemiological  
393 surveillance of norovirus and rotavirus in sewage (2016–2017) in Valencia (Spain).  
394 *Microorganisms.* <https://doi.org/10.3390/microorganisms8030458>
- 395 Vogels, C.B.F., Brito, A.F., Wyllie, A.L., Fauver, J.R., Ott, I.M., Kalinich, C.C.,  
396 Petrone, M.E., Casanovas-Massana, A., Muenker, M.C., Moore, A.J., Klein, J., Lu,  
397 P., Lu-Culligan, A., Jiang, X., Kim, D.J., Kudo, E., Mao, T., Moriyama, M., Oh,  
398 J.E., Park, A., Silva, J., Song, E., Takehashi, T., Taura, M., Tokuyama, M.,  
399 Venkataraman, A., Weizman, O.-E., Wong, P., Yang, Y., Cheemarla, N.R., White,  
400 E., Lapidus, S., Earnest, R., Geng, B., Vijayakumar, P., Odio, C., Fournier, J.,  
401 Bermejo, S., Farhadian, S., Dela Cruz, C., Iwasaki, A., Ko, A.I., Landry, M.-L.,  
402 Foxman, E.F., Grubaugh, N.D., 2020. Analytical sensitivity and efficiency  
403 comparisons of SARS-COV-2 qRT-PCR assays. *medRxiv* 2020.03.30.20048108.  
404 <https://doi.org/10.1101/2020.03.30.20048108>
- 405 Wang, W., Xu, Y., Gao, R., Lu, R., Han, K., Wu, G., Tan, W., 2020. Detection of  
406 SARS-CoV-2 in Different Types of Clinical Specimens. *JAMA.*  
407 <https://doi.org/10.1001/jama.2020.3786>
- 408 Wang, X.-W., Li, J.-S., Jin, M., Zhen, B., Kong, Q.-X., Song, N., Xiao, W.-J., Yin, J.,  
409 Wei, W., Wang, G.-J., Si, B.-Y., Guo, B.-Z., Liu, C., Ou, G.-R., Wang, M.-N.,  
410 Fang, T.-Y., Chao, F.-H., Li, J.-W., 2005. Study on the resistance of severe acute  
411 respiratory syndrome-associated coronavirus. *J. Virol. Methods* 126, 171–177.  
412 <https://doi.org/10.1016/j.jviromet.2005.02.005>
- 413 WHO, W.H.O., 2020. Water, sanitation, hygiene and waste management for COVID-19  
414 [WWW Document]. URL [https://www.who.int/publications-detail/water-](https://www.who.int/publications-detail/water-sanitation-hygiene-and-waste-management-for-covid-19)  
415 [sanitation-hygiene-and-waste-management-for-covid-19](https://www.who.int/publications-detail/water-sanitation-hygiene-and-waste-management-for-covid-19) (accessed 4.21.20).
- 416 Woelfel, R., Corman, V.M., Guggemos, W., Seilmaier, M., Zange, S., Mueller, M.A.,  
417 Niemeyer, D., Vollmar, P., Rothe, C., Hoelscher, M., Bleicker, T., Bruenink, S.,  
418 Schneider, J., Ehmann, R., Zwirgmaier, K., Drosten, C., Wendtner, C., 2020.  
419 Clinical presentation and virological assessment of hospitalized cases of



- 420 coronavirus disease 2019 in a travel-associated transmission cluster. medRxiv  
421 2020.03.05.20030502. <https://doi.org/10.1101/2020.03.05.20030502>
- 422 Wu, F., Xiao, A., Zhang, J., Gu, X., Lee, W.L., Kauffman, K., Hanage, W., Matus, M.,  
423 Ghaeli, N., Endo, N., Duvallet, C., Moniz, K., Erickson, T., Chai, P., Thompson,  
424 J., Alm, E., 2020. SARS-CoV-2 titers in wastewater are higher than expected from  
425 clinically confirmed cases. medRxiv 2020.04.05.20051540.  
426 <https://doi.org/10.1101/2020.04.05.20051540>
- 427 Wu, Y., Guo, C., Tang, L., Hong, Z., Zhou, J., Dong, X., Yin, H., Xiao, Q., Tang, Y.,  
428 Qu, X., Kuang, L., Fang, X., Mishra, N., Lu, J., Shan, H., Jiang, G., Huang, X.,  
429 2020. Prolonged presence of SARS-CoV-2 viral RNA in faecal samples. *Lancet*  
430 *Gastroenterol. Hepatol.* 5, 434–435. [https://doi.org/10.1016/S2468-](https://doi.org/10.1016/S2468-1253(20)30083-2)  
431 [1253\(20\)30083-2](https://doi.org/10.1016/S2468-1253(20)30083-2)
- 432 Wurtzer, S., Marechal, V., Mouchel, J.-M., Moulin, L., 2020. Time course quantitative  
433 detection of SARS-CoV-2 in Parisian wastewaters correlates with COVID-19  
434 confirmed cases. medRxiv 2020.04.12.20062679.  
435 <https://doi.org/10.1101/2020.04.12.20062679>
- 436 Xiao, F., Tang, M., Zheng, X., Li, C., He, J., Hong, Z., Huang, S., Zhang, Z., Lin, X.,  
437 Fang, Z., Lai, R., Chen, S., Liu, J., Huang, J., Xia, J., Li, Z., Jiang, G., Liu, Y., Li,  
438 X., Shan, H., 2020. Evidence for gastrointestinal infection of SARS-CoV-2.  
439 medRxiv 2020.02.17.20023721. <https://doi.org/10.1101/2020.02.17.20023721>
- 440 Xu, Y., Li, X., Zhu, B., Liang, H., Fang, C., Gong, Y., Guo, Q., Sun, X., Zhao, D.,  
441 Shen, J., Zhang, H., Liu, H., Xia, H., Tang, J., Zhang, K., Gong, S., 2020.  
442 Characteristics of pediatric SARS-CoV-2 infection and potential evidence for  
443 persistent fecal viral shedding. *Nat. Med.* 26, 502–505.  
444 <https://doi.org/10.1038/s41591-020-0817-4>
- 445 Yeo, C., Kaushal, S., Yeo, D., 2020. Enteric involvement of coronaviruses: is  
446 faecal&#x2013;oral transmission of SARS-CoV-2 possible? *Lancet Gastroenterol.*  
447 *Hepatol.* 5, 335–337. [https://doi.org/10.1016/S2468-1253\(20\)30048-0](https://doi.org/10.1016/S2468-1253(20)30048-0)
- 448 Young, B.E., Ong, S.W.X., Kalimuddin, S., Low, J.G., Tan, S.Y., Loh, J., Ng, O.-T.,  
449 Marimuthu, K., Ang, L.W., Mak, T.M., Lau, S.K., Anderson, D.E., Chan, K.S.,  
450 Tan, T.Y., Ng, T.Y., Cui, L., Said, Z., Kurupatham, L., Chen, M.I.-C., Chan, M.,  
451 Vasoo, S., Wang, L.-F., Tan, B.H., Lin, R.T.P., Lee, V.J.M., Leo, Y.-S., Lye, D.C.,  
452 Team, for the S. 2019 N.C.O.R., 2020. Epidemiologic Features and Clinical  
453 Course of Patients Infected With SARS-CoV-2 in Singapore. *JAMA.*  
454 <https://doi.org/10.1001/jama.2020.3204>
- 455 Zhang, W., Du, R.-H., Li, B., Zheng, X.-S., Yang, X.-L., Hu, B., Wang, Y.-Y., Xiao,  
456 G.-F., Yan, B., Shi, Z.-L., Zhou, P., 2020. Molecular and serological investigation  
457 of 2019-nCoV infected patients: implication of multiple shedding routes. *Emerg.*  
458 *Microbes Infect.* 9, 386–389. <https://doi.org/10.1080/22221751.2020.1729071>
- 459 Zhou, X., Zhang, T., Song, D., Huang, T., Peng, Q., Chen, Y., Li, A., Zhang, F., Wu,  
460 Q., Ye, Y., Tang, Y., 2017. Comparison and evaluation of conventional RT-PCR,  
461 SYBR green I and TaqMan real-time RT-PCR assays for the detection of porcine  
462 epidemic diarrhea virus. *Mol. Cell. Probes* 33, 36–41.  
463 <https://doi.org/https://doi.org/10.1016/j.mcp.2017.02.002>



465 **Figure 1.** Maps of the sampling location. Symbols represents WWTPs and are sized  
466 according to the number of equivalent inhabitants.

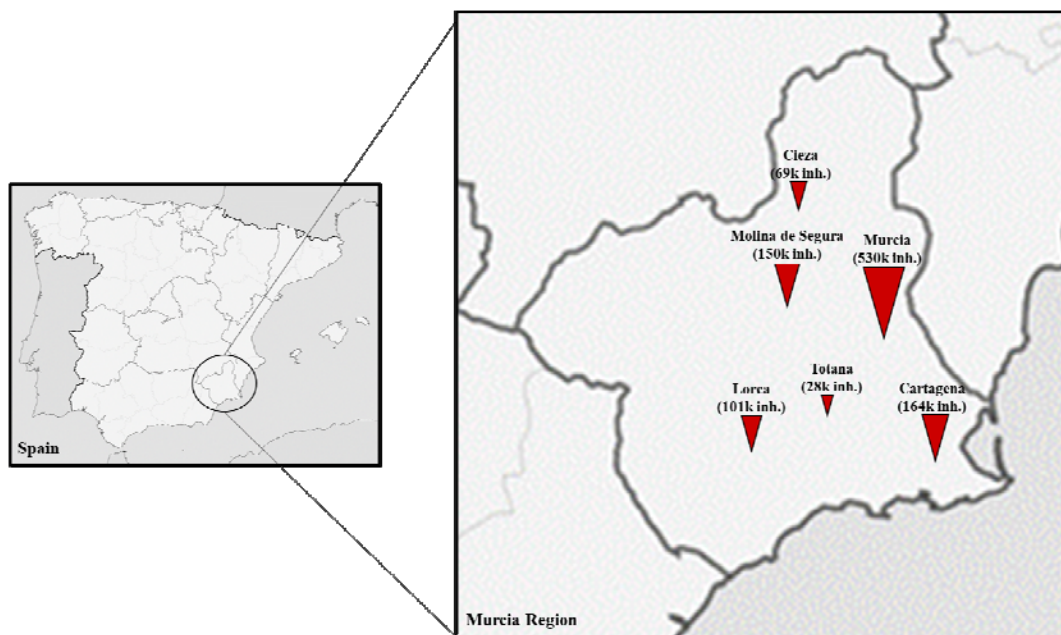

467

468 **Table 1.** Operating characteristics of WWTPs.

|                         | Population |            | Capacity (m <sup>3</sup> /a) |            | Reclamation processes                                                                                            | Reuse         |
|-------------------------|------------|------------|------------------------------|------------|------------------------------------------------------------------------------------------------------------------|---------------|
|                         | Connected  | Equivalent | Designed                     | Current    |                                                                                                                  |               |
| <b>Murcia</b>           | 370,893    | 530,499    | 36,500,000                   | 36,952,999 | Activated sludge (A2O process), Disinfection, NaClO                                                              | Public domain |
| <b>Cartagena</b>        | 175,870    | 163,969    | 12,775,000                   | 8,625,103  | Activated sludge, Disinfection                                                                                   | Irrigation    |
| <b>Molina de Segura</b> | 67,455     | 150,545    | 9,125,000                    | 5,699,930  | Activated sludge, Decantation, Coagulation, Flocculation, Sand filtration, Disinfection, UV, NaClO               | Irrigation    |
| <b>Lorca</b>            | 73,057     | 101,161    | 7,300,000                    | 3,366,919  | Activated sludge, Coagulation, Flocculation, Sand filtration, Disinfection, UV, NaClO                            | Irrigation    |
| <b>Cieza</b>            | 33,744     | 69,502     | 3,650,000                    | 2,338,673  | Activated sludge (Extended aeration), Disinfection, Coagulation, Flocculation, Sand filtration, Disinfection, UV | Irrigation    |
| <b>Totana</b>           | 29,113     | 28,289     | 2,190,000                    | 1,440,463  | Activated sludge (Extended aeration), Disinfection, UV                                                           | Irrigation    |

469

470 **Figure 2.** Mean amplification cycles of SARS-CoV-2 RNA in influent, secondary and  
 471 tertiary effluent waters in monitored WWTPs within Murcia Region (Spain).  
 472 Results are reported for each of the three regions of the virus nucleocapsid (N) gene  
 473 according to the first version of the Real-Time RT-PCR Diagnostic Panel by US CDC.  
 474 Abbreviations: -, negative; white boxes, not tested.  
 475  
 476

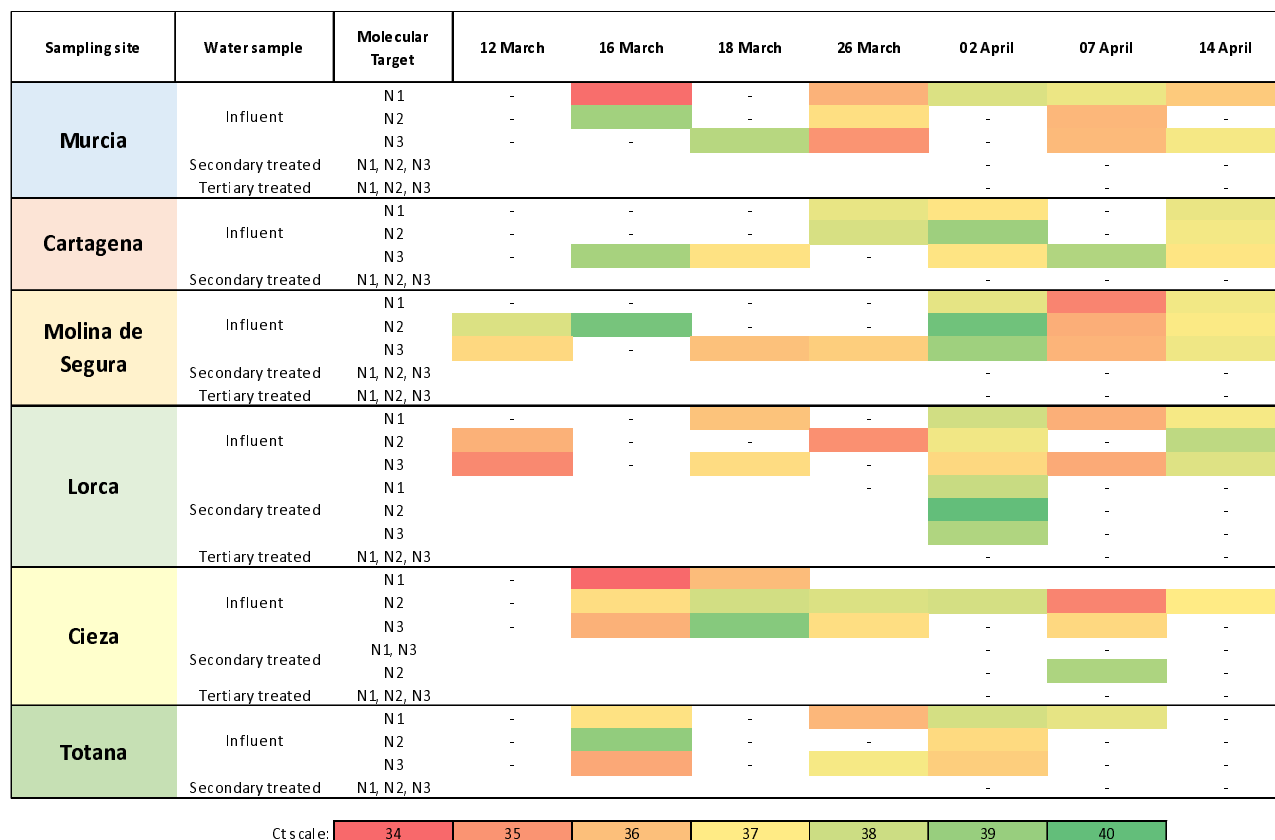

477 **Table 2.** Epidemiological data<sup>1</sup> summary of COVID-19 cases in the area of study.

|                         | 20/03/2020 |                         | 25/03/2020 |            | 30/03/2020 |            | 08/04/2020 |            | 15/04/2020 |            |
|-------------------------|------------|-------------------------|------------|------------|------------|------------|------------|------------|------------|------------|
|                         | Cases      | Prevalence <sup>2</sup> | Cases      | Prevalence | Cases      | Prevalence | Cases      | Prevalence | Cases      | Prevalence |
| <b>Murcia</b>           | 96         | 21.18                   | 210        | 46.33      | 332        | 73.2       | 551        | 121.6      | 622        | 137.2      |
| <b>Cartagena</b>        | 36         | 16.76                   | 64         | 29.79      | 111        | 51.7       | 163        | 75.9       | 190        | 88.5       |
| <b>Molina de Segura</b> | 12         | 16.69                   | 26         | 36.17      | 40         | 55.6       | 60         | 83.5       | 70         | 97.4       |
| <b>Lorca</b>            | -          | -                       | 8          | 8.47       | 18         | 19.1       | 29         | 30.7       | 31         | 32.8       |
| <b>Cieza</b>            | -          | -                       | 12         | 34.30      | 22         | 62.9       | 45         | 128.6      | 49         | 140.0      |
| <b>Totana</b>           | -          | -                       | -          | -          | 7          | 21.9       | 13         | 40.6       | 14         | 43.7       |

478

479 <sup>1</sup> Data retrieved from the public repository of the “Servicio de epidemiología” of the “Consejería de Salud de la Región de Murcia” (available at  
 480 <http://www.murciasalud.es/principal.php>).

481 <sup>2</sup> Prevalence, percentage of diagnosed cases per 100.000 inhabitants.

482 **Figure 3.** Epidemiological surveillance of COVID-19 by wastewater SARS-CoV-2 RT-  
483 qPCR in six municipalities.

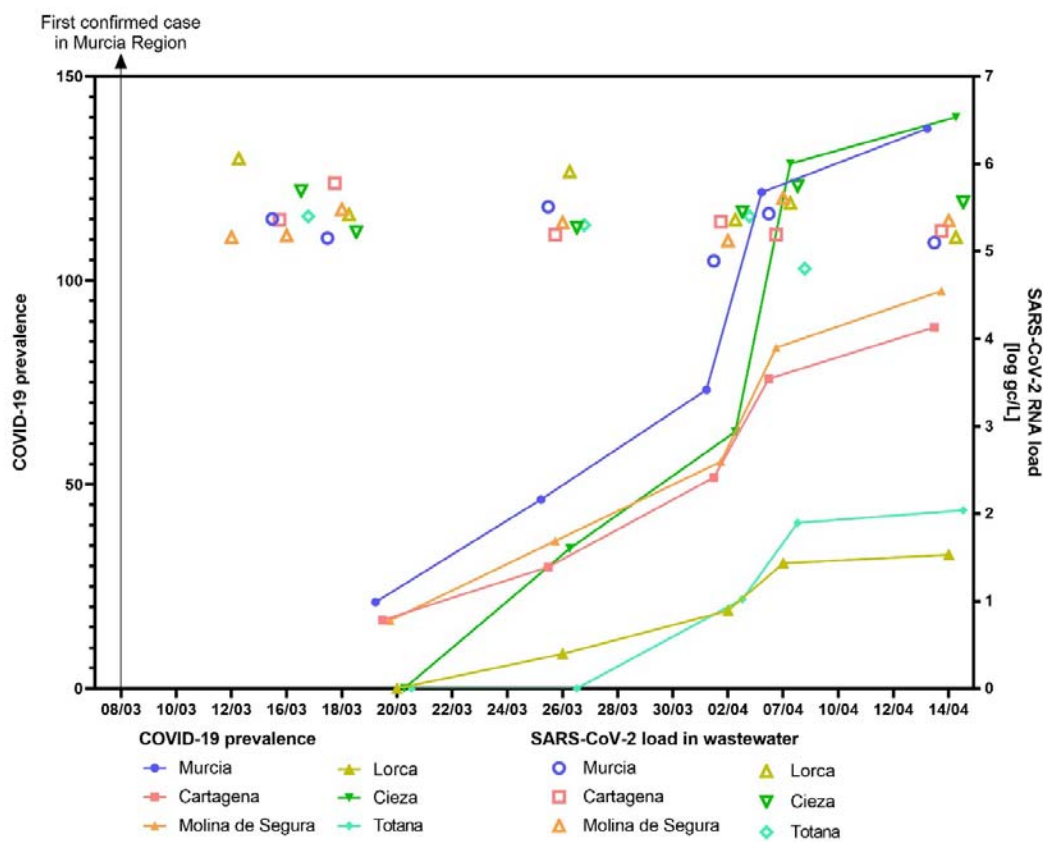

484

485
